# Supplementary material
Source: MDPI journal article supplement (https://www.mdpi.com/2813-6284/2/1/1)
Supplement: s1 [file s1]

## Supplemental Material

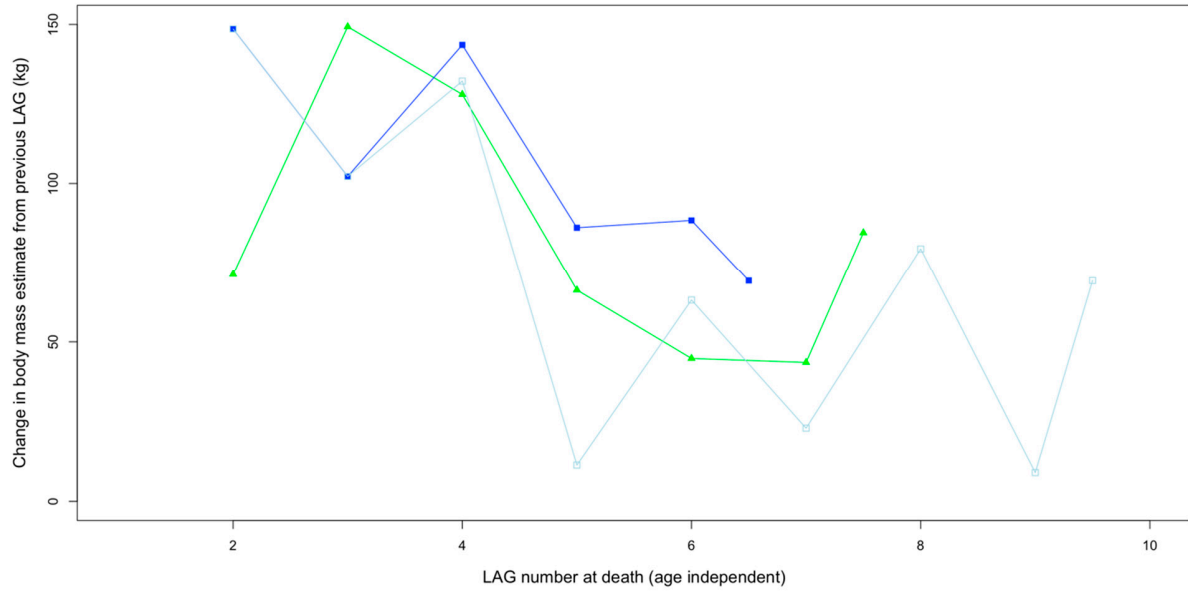

**Figure S1.** Growth rates in putative *Nanotyrannus* specimens Petey (green, triangles) and Jane, both uncorrected (light blue, open squares) and corrected for split multi-LAGs (dark blue, closed squares). Periosteum is included here as a half-LAG. LAG 1 is not included due to incomplete growth record and challenges of estimating endosteal circumference from Jane's incomplete femur.

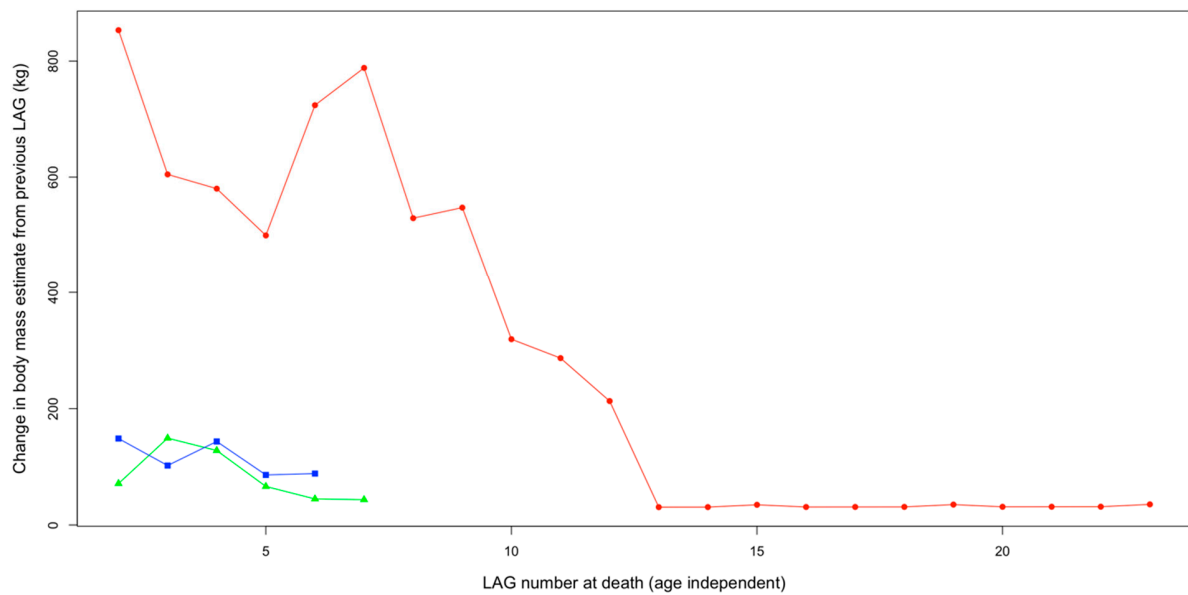

**Figure S2.** Growth rates in the *T. rex* Sue (red, circles) as well as putative *Nanotyrannus* specimens Petey (green, triangles) and Jane, corrected for split multi-LAGs (dark blue, closed squares). Periosteum is not included here. LAG 1 is not included due to incomplete growth record and challenges of estimating endosteal circumference from Jane's incomplete femur.

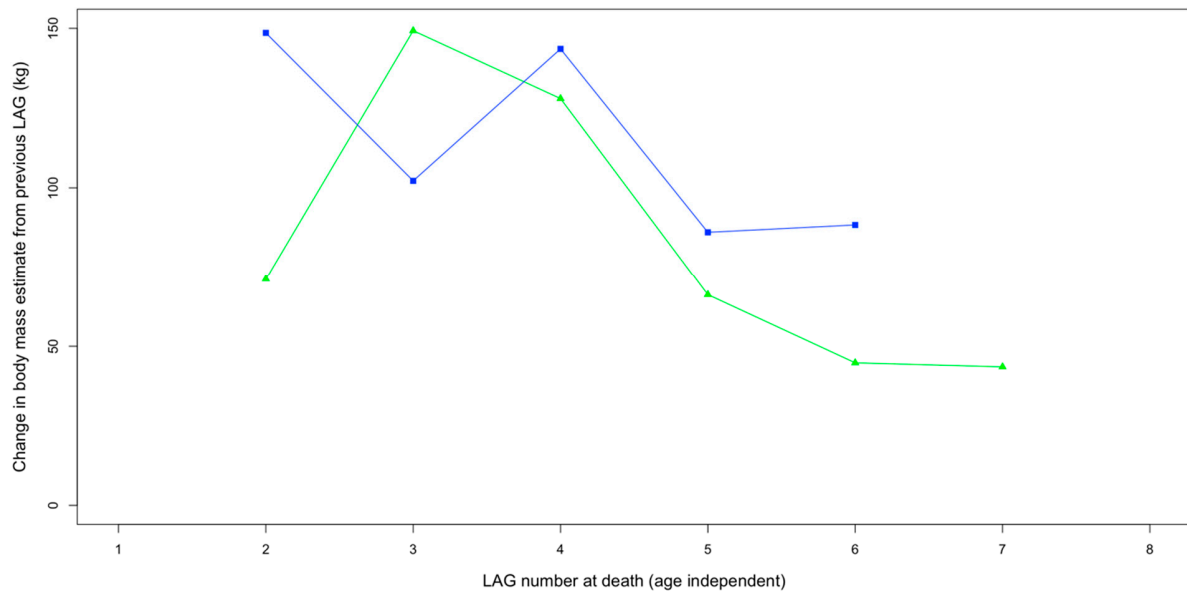

**Figure S3.** Growth rates in putative *Nanotyrannus* specimens Petey (green, triangles) and Jane, corrected for split multi-LAGs (dark blue, closed squares). Periosteum is not included here. LAG 1 is not included due to incomplete growth record and challenges of estimating endosteal circumference from Jane's incomplete femur.

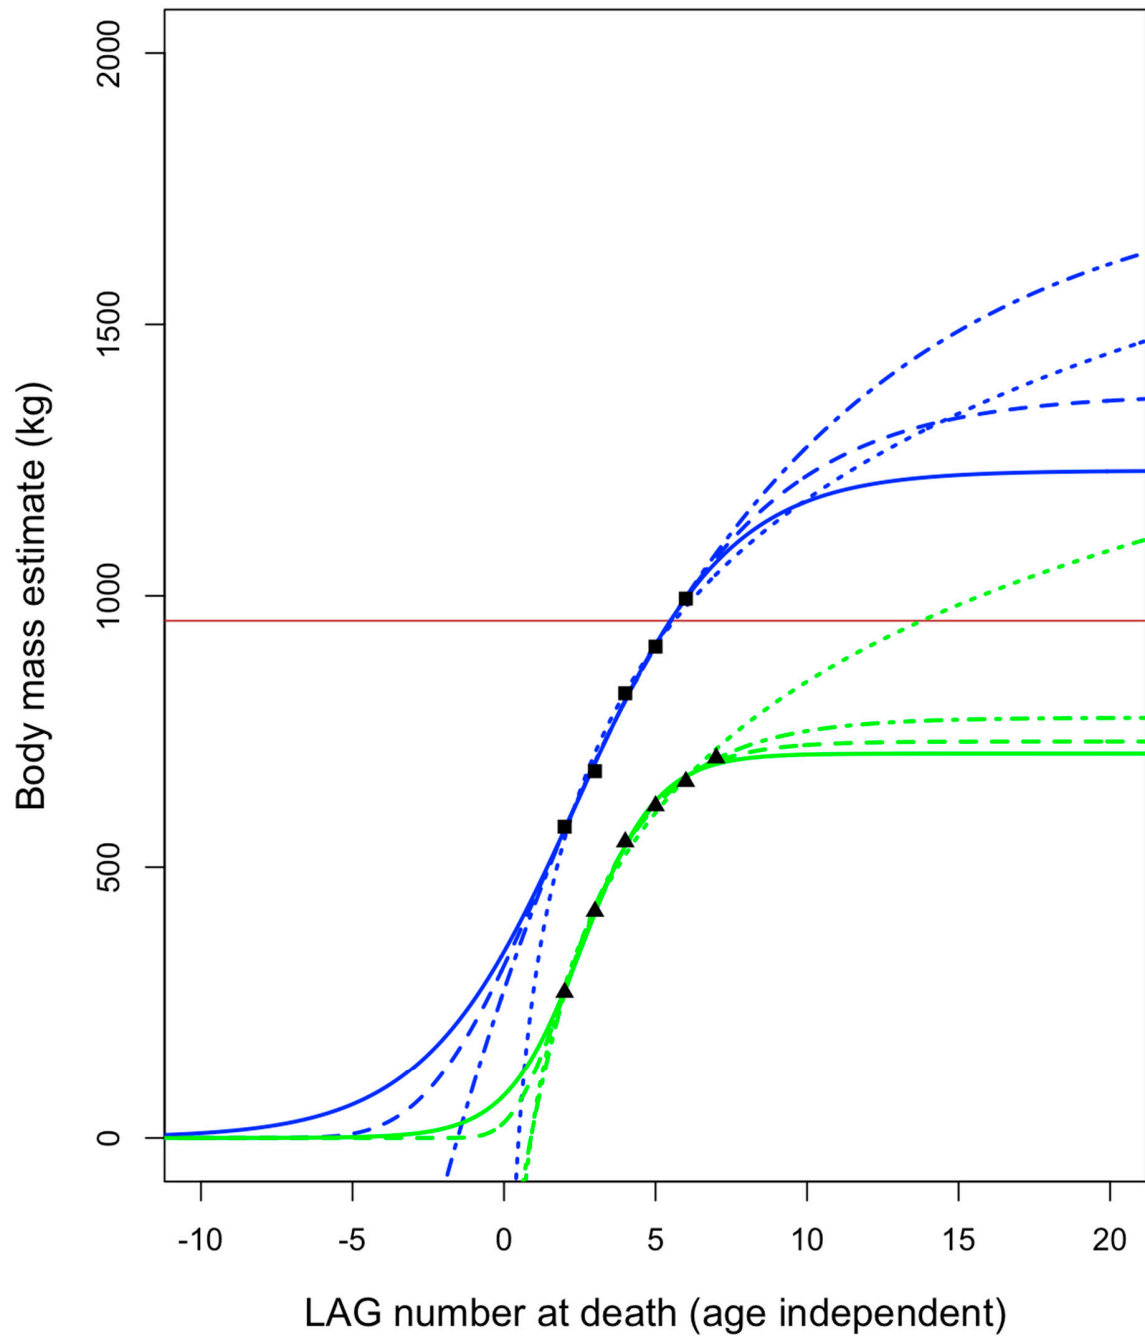

**Figure S4.** Age-independent growth curves for two *Nanotyrannus* specimens, Petey (green, triangles) and Jane (dark blue, solid squares), corrected for split multi-LAGs as in Cullen *et al.* (2020). LAG #1 and the periosteum are not included in the regressions shown here. Four different growth models are fit to each specimen: logistic (solid), Gompertz (dashed), logarithmic (dotted),

and von Bertalanffy (dot-dash). Brown horizontal line is the mass estimate at time of death for Jane from Hutchinson *et al.* (2011) using 3D modelling.

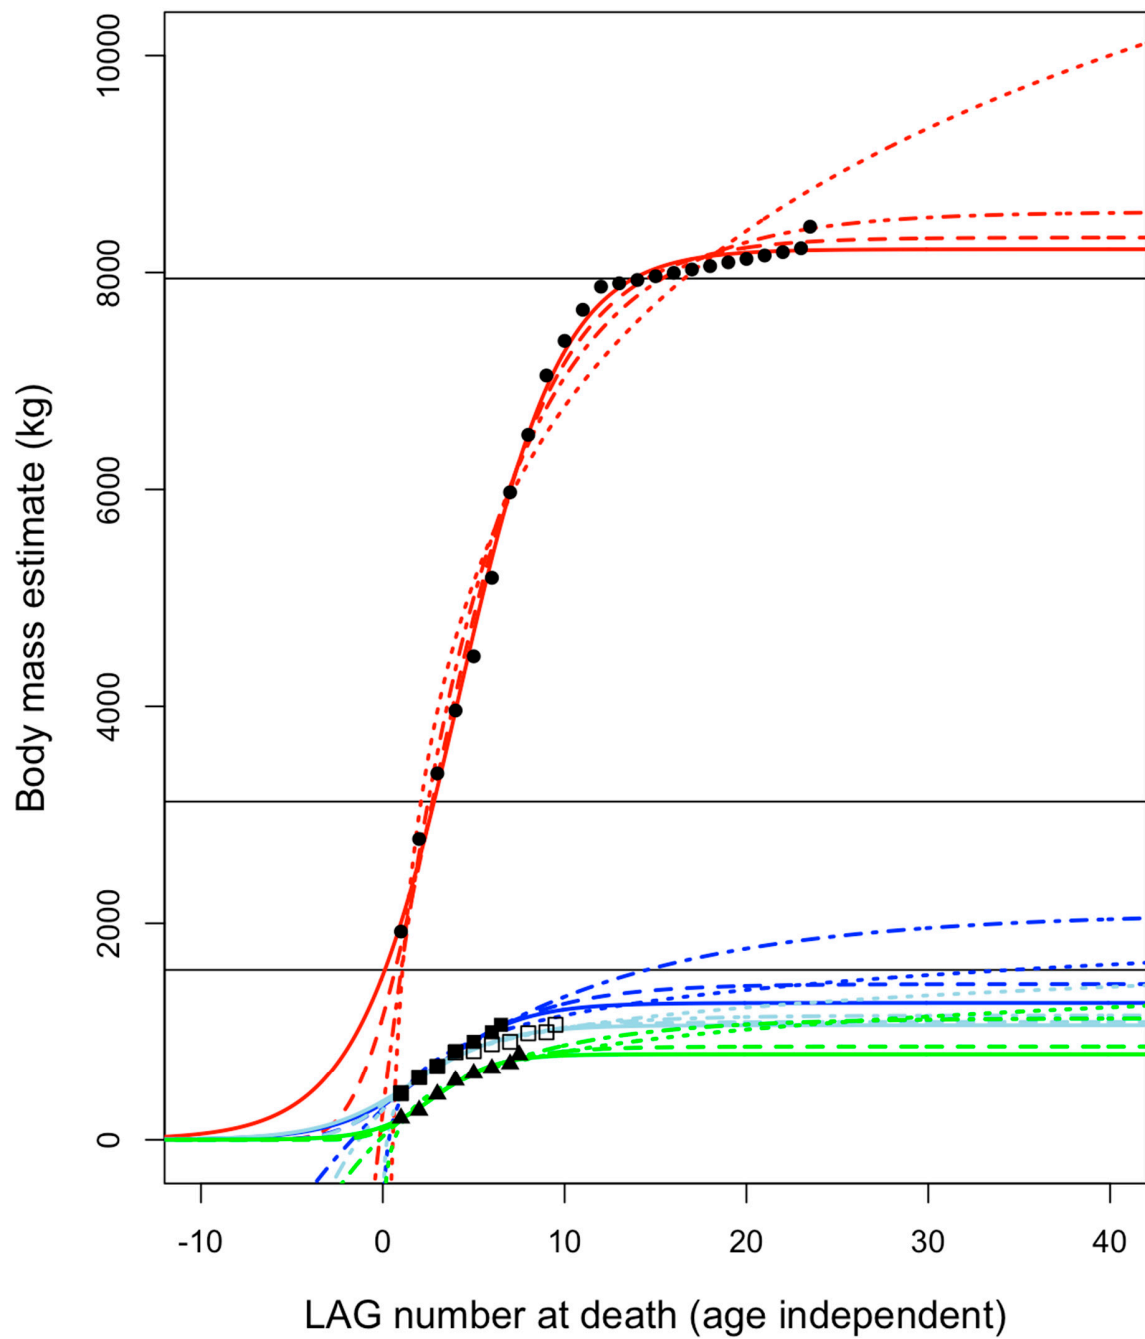

**Figure S5.** Age-independent growth curves for a large and old *Tyrannosaurus*, Sue (red, circles), and two *Nanotyrannus*, Petey (green, triangles) and Jane, presented both corrected for split multi-LAGs (dark blue, closed squares) as in Cullen *et al.* (2020) as well as uncorrected (light blue, open squares) as in Woodward *et al.* (2020). LAG #1 and the periosteum are included in the regressions shown here. Four different growth models are fit to each specimen: logistic (solid), Gompertz (dashed), logarithmic (dotted), and von Bertalanffy (dot-dash). Horizontal black lines are asymptotic masses derived from logistic regressions of multiple individuals (i.e., multiple specimens used in the regression, with each specimen assigned a single mass and age at death) from Longrich *et al.* (in review) and are presented in decreasing order as follows: *Tyrannosaurus*, *Gorgosaurus*, *Albertosaurus*.

**Table S1.** Summary of asymptotic body mass values rounded to nearest kg. Among asymptotic models, discrepancy between *T. rex* and the two *Nanotyrannus* specimens' body mass values range from about 391–1,207%, if comparison across model types is allowed.

| Specimen         | Taxon                | Interpretation         | Includes 1st LAG & periosteum? | Model           | Asymptote (kg) |
|------------------|----------------------|------------------------|--------------------------------|-----------------|----------------|
| Sue              | <i>Tyrannosaurus</i> | Cullen et al. (2020)   | Yes                            | Logistic        | 8214           |
| Sue              | <i>Tyrannosaurus</i> | Cullen et al. (2020)   | Yes                            | Gompertz        | 8322           |
| Sue              | <i>Tyrannosaurus</i> | Cullen et al. (2020)   | Yes                            | von Bertalanffy | 8558           |
| Sue              | <i>Tyrannosaurus</i> | Cullen et al. (2020)   | No                             | Logistic        | 8194           |
| Sue              | <i>Tyrannosaurus</i> | Cullen et al. (2020)   | No                             | Gompertz        | 8287           |
| Sue              | <i>Tyrannosaurus</i> | Cullen et al. (2020)   | No                             | von Bertalanffy | 8463           |
| Petey            | <i>Nanotyrannus</i>  | Cullen et al. (2020)   | Yes                            | Logistic        | 792            |
| Petey            | <i>Nanotyrannus</i>  | Cullen et al. (2020)   | Yes                            | Gompertz        | 862            |
| Petey            | <i>Nanotyrannus</i>  | Cullen et al. (2020)   | Yes                            | von Bertalanffy | 1124           |
| Petey            | <i>Nanotyrannus</i>  | Cullen et al. (2020)   | No                             | Logistic        | 709            |
| Petey            | <i>Nanotyrannus</i>  | Cullen et al. (2020)   | No                             | Gompertz        | 732            |
| Petey            | <i>Nanotyrannus</i>  | Cullen et al. (2020)   | No                             | von Bertalanffy | 775            |
| Jane (corrected) | <i>Nanotyrannus</i>  | Cullen et al. (2020)   | Yes                            | Logistic        | 1265           |
| Jane (corrected) | <i>Nanotyrannus</i>  | Cullen et al. (2020)   | Yes                            | Gompertz        | 1439           |
| Jane (corrected) | <i>Nanotyrannus</i>  | Cullen et al. (2020)   | Yes                            | von Bertalanffy | 2097           |
| Jane (corrected) | <i>Nanotyrannus</i>  | Cullen et al. (2020)   | No                             | Logistic        | 1230           |
| Jane (corrected) | <i>Nanotyrannus</i>  | Cullen et al. (2020)   | No                             | Gompertz        | 1372           |
| Jane (corrected) | <i>Nanotyrannus</i>  | Cullen et al. (2020)   | No                             | von Bertalanffy | 1783           |
| Jane             | <i>Nanotyrannus</i>  | Woodward et al. (2020) | Yes                            | Logistic        | 1060           |
| Jane             | <i>Nanotyrannus</i>  | Woodward et al. (2020) | Yes                            | Gompertz        | 1091           |
| Jane             | <i>Nanotyrannus</i>  | Woodward et al. (2020) | Yes                            | von Bertalanffy | 1150           |

**Table S2.** Summary of asymptotic values rounded to nearest mm for the pubic radius of Zuri. Among asymptotic models, the pubic radius at time of death ranges from about 90–98% of the predicted adult size.

| Model asymptote | With LAG #1<br>& periosteum? | Pubic radius<br>(mm) |
|-----------------|------------------------------|----------------------|
| Logistic        | Yes                          | 18.7                 |
| Gompertz        | Yes                          | 19                   |
| von Bertalanffy | Yes                          | 19.6                 |
| Logistic        | No                           | 19.1                 |
| Gompertz        | No                           | 19.6                 |
| von Bertalanffy | No                           | 20.3                 |
| Radius at death | NA                           | 18.3                 |
